# Supplementary material for: Early Orthodontic Treatments of Unilateral Posterior Crossbite: A Systematic Review
Source: PubMed Central journal article supplement (PMC7795353; doi:10.3390/jcm10010033), 2020-12-24
Supplement: jcm-10-00033-s001.pdf [file jcm-10-00033-s001.pdf]

**Supplementary Table 1.** Summary risk of bias assessment of Randomized Clinical trial according the Cochrane collaboration's risk of bias assessment tool

| Trial (Author and year)                     | Random sequence generation (selection bias)                 | Allocation concealment (selection bias)                            | Blinding of outcome assessment (detection bias) | Incomplete outcome data (attrition bias)                                        | Selective reporting (reporting bias)                                                  | Other sources of bias | Overall Risk of bias |
|---------------------------------------------|-------------------------------------------------------------|--------------------------------------------------------------------|-------------------------------------------------|---------------------------------------------------------------------------------|---------------------------------------------------------------------------------------|-----------------------|----------------------|
| Ugolini et al. [28] and Cerruto et al. [29] | <b>Low risk</b><br>Using a stratified blocked randomization | <b>Unclear</b>                                                     | <b>Low risk</b><br>Blinding in measurements     | <b>Low risk</b><br>No dropouts or patient losses are reported                   | <b>High risk</b><br>Cost-effective analysis is not reported                           | <b>Low risk</b><br>No | <b>High risk</b>     |
| Petrén et al. [5,26]                        | <b>Unclear</b>                                              | <b>Unclear</b>                                                     | <b>Low risk</b><br>Blinding in measurements     | <b>Low risk</b><br>5 dropouts are reported but sample size remained sufficient  | <b>Low risk</b><br>All outcomes that are of interest in the review have been reported | <b>Low risk</b><br>No | <b>Unclear</b>       |
| Petrén and Brondemark [8]                   | <b>Low risk</b><br>Patients were randomly allocated         | <b>Low risk</b><br>Sequentially numbered, opaque, sealed envelopes | <b>Low risk</b><br>Blinding in measurements     | <b>Low risk</b><br>No dropouts or patient losses are reported                   | <b>High risk</b><br>Cost-effective analysis and expansion remained are not reported   | <b>Low risk</b><br>No | <b>High risk</b>     |
| Lippold et al. [18]                         | <b>Low risk</b><br>Using a stratified blocked randomization | <b>Unclear</b>                                                     | <b>Unclear</b><br>No information provided       | <b>Low risk</b><br>11 dropouts are reported but sample size remained sufficient | <b>High risk</b><br>Cost-effective analysis and expansion remained are not reported   | <b>Low risk</b><br>No | <b>High risk</b>     |
| Godoy et al. [9]                            | <b>Low risk</b>                                             | <b>Low risk</b><br>Numbers randomly drawn                          | <b>Low risk</b><br>Blinding in measurements     | <b>Low risk</b>                                                                 | <b>Low risk</b>                                                                       | <b>Low risk</b><br>No | <b>Low risk</b>      |

|  |                                  |                    |  |                                            |                                             |  |  |
|--|----------------------------------|--------------------|--|--------------------------------------------|---------------------------------------------|--|--|
|  | Patients were randomly allocated | from a plastic bag |  | No dropouts or patient losses are reported | All interesting outcomes have been reported |  |  |
|--|----------------------------------|--------------------|--|--------------------------------------------|---------------------------------------------|--|--|

**Supplementary Table 2.** Summary risk of bias assessment of the non-randomized studies according to the ROBINS-I tool

| <b>Risk of bias assessment</b>                     |                 |                     |                 |                     |                      |  |
|----------------------------------------------------|-----------------|---------------------|-----------------|---------------------|----------------------|--|
|                                                    | <b>Response</b> | Bukhari et al. [10] | Wong et al. [7] | Weyrich et al. [27] | Primožic et al. [30] |  |
| Bias due to confounding                            |                 | Low                 | Low             | Low                 | Low                  |  |
| Bias in selection of participants into the study   |                 | Low                 | Low             | Low                 | Low                  |  |
| Bias in classification of interventions            |                 | Low                 | Serious         | Low                 | Low                  |  |
| Bias due to deviations from intended interventions |                 | Low                 | Low             | Low                 | Low                  |  |
| Bias due to missing data                           |                 | Low                 | Low             | Low                 | Low                  |  |
| Bias in measurement of outcomes                    |                 | Low                 | Moderate        | Moderate            | Moderate             |  |
| Bias in selection of reported result               |                 | Low                 | Low             | Low                 | Moderate             |  |
| Overall bias                                       |                 | Low                 | Serious         | Moderate            | Moderate             |  |
|                                                    | Low             |                     |                 |                     |                      |  |
|                                                    | Moderate        |                     |                 |                     |                      |  |
|                                                    | Serious         |                     |                 |                     |                      |  |

|  |                |  |  |  |  |
|--|----------------|--|--|--|--|
|  | Critical       |  |  |  |  |
|  | No information |  |  |  |  |

## Complete Search Strategy

### PUBMED

"palatal expansion technique"[MeSH Terms] AND ("dentition, mixed"[MeSH Terms] OR "tooth, deciduous"[MeSH Terms])

### THE COCHRANE LIBRARY AND TRIALS

Title, Abstract, Keyword: palatal expansion AND (mixed dentition OR deciduous teeth)

### LILACS

((((( palatal expansion ) or "PALATAL EXPANSION TECHNIC" ) or "PALATAL EXPANSION TECHNICS" ) or "PALATAL EXPANSION TECHNIC/AE" ) or "EXPANSION MAXILAR/AE" ) or "MAXILLARY EXPANSION/AE" [Palabras] and ( ( tooth deciduous ) or "DECIDUOUS DENTITION" ) or "MIXED DENTITION" [Palabras]

### WEB OF SCIENCE

(TS = (palatal expansion)) AND (TS = "tooth deciduous" OR "teeth deciduous" OR "mixed dentition")

### GOOGLE SCHOLAR

unilateral posterior crossbite correction in mixed dentition or deciduous
